# Supplementary material for: DeepBindGCN: Integrating Molecular Vector Representation with Graph Convolutional Neural Networks for Protein–Ligand Interaction Prediction
Source: MDPI journal article supplement (doi:10.3390/molecules28124691), 2023-06-10
Supplement: s1 [file s1]

### **Supplementary Material Section S1:**

To obtain the dataset for DeepBindGCN\_RG\_x, we excluded PDBbind v.2016 core set (CASF-2016 core set) and v.2013 core set from the PDBbind database and finally obtained 16,584 protein-ligand pairs. The dataset was divided into training and validation sets, containing 16,000 and 584 samples, respectively. The v.2013 core set (195 protein-ligand pairs) and PDBbind v.2016 core set (285 protein-ligand pairs) were kept as testing sets. The architecture is the same as the DeepBindGCN\_RG; the entire training epoch is 2000; the models were saved every 100 epochs.

## **Supplementary Material Section S2:**

### **Detailed procedure of MD, pocket MD, and metadynamics simulation**

The initial protein-compound complexes were from the top score conformation Schrödinger docking. The ligand was edited by pymol software [1] to make it in the correct protonation state at pH 7.

We performed MD simulations for the TIPE3-compound complexes. We have cut the “FSSKSLALQAQKKILSKIAS” (amino acid 110 to 129) part of the TIPE3 to save the simulation resource. To save the computational resources, we have carried pocket MD for DNA-PKcs-compound and PD-L1-compound complexes by only keeping the binding pocket region for simulation. Metadynamics simulations can estimate binding free energy calculation to explore whether protein-ligand will bind in solution. Metadynamics relies on adding a bias potential to sample the free energy landscape along a specific collective variable of interest [2][3]. Note that the binding free energy calculations from Metadynamics may only be suitable for detecting the general trend of binding in virtual screening.

The pocket MD is the same as the classical MD simulation, except that we only use the pocket region to reduce system size for simulation [4], which is inspired by a previous dynamic undocking (DUck) method [5]. An in-house script was used to extract the pocket region of the protein (here, we used 1.2nm within the binding ligand), and the N terminal and C terminal ends were capped with the ACE and NHE terminals, respectively. We applied position restraints to the ACE and NHE terminals to maintain the relative conformation of the pocket. MD or pocket MD simulation was carried out by Gromacs with AMBER-99SB force field [6,7]. The topology of the ligand and the partial charges of the ligand were generated by ACPYPE [8], which relies on Antechamber [9]. Firstly, we created a dodecahedron box and

put the target-ligand complex at the center. A minimum distance from the protein to the box edge was set to 1 nm. We filled the dodecahedron box with TIP3P water molecules [10], and the counter ions were added to neutralize the total charge using the Gromacs program tool [11]. The long-range electrostatic interactions under the periodic boundary conditions were calculated with the Particle Mesh Ewald approach [12]. A cutoff of 14 Å was used for van der Waals non-bonded interactions. Covalent bonds involving hydrogen atoms were constrained by applying the LINCS algorithm [13].

We performed the energy minimization steps with a step-size of 0.001ns, 100 ps simulation with an isothermal-isovolumetric ensemble (NVT), and 10ns simulation with the isothermal-isobaric ensemble (NPT) for water equilibrium. After that, a 40ns NPT production run (step size 2 fs) was carried out. The Parrinello-Rahman barostat and the modified Berendsen thermostat were used for simulation with a fixed temperature of 308 K and a pressure of 1 atm. RMSD and hydrogen bond number of the trajectory were calculated using Gromacs tools.

The simulation continued using the metadynamics approach to explore the free energy landscape. We carried 40ns metadynamics simulation with Plumed[14] patched Gromacs. The protein-ligand complex's interface coordination number of atoms was used as a collective variable (CV). The protein-ligand interface coordination numbers correlate with the numbers of atom contact, and a larger coordination number usually indicates that the protein-ligand is binding.

The coordination number  $C$  is defined as follows by Plumed:

$$C = \sum_{i \in A} \sum_{j \in B} S_{ij} \quad (1) \quad \text{and}$$

$$S_{ij} = \frac{1 - \left( \frac{r_{ij} - d_0}{r_0} \right)^n}{1 - \left( \frac{r_{ij} - d_0}{r_0} \right)^m} \quad (2)$$

In the simulation,  $n$  was 6,  $m$  was 12,  $d_0$  was 0 nm, and  $r_0$  was 0.5 nm.  $d_0$  is a parameter of the switching function.  $r_{ij}$  is the distance between atom  $i$  and atom  $j$ . The degrees of contact between two groups of atoms can be estimated by the above function(1) [14]. Metadynamics simulation for each protein-ligand system was performed for 40 ns. During the metadynamics simulation, Gaussian values were deposited every 1 ps with a height of 0.3 kJ/mol. The widths of the Gaussians were 5 for the coordination number. The free energy landscapes of the metadynamics simulations along the CV were generated by the Plumed program and plotted using Gnuplot [15].

**Supplementary Figures:**

**A** Binary classification, molecular vector represent amino acid with pocket cutoff of 0.6 nm

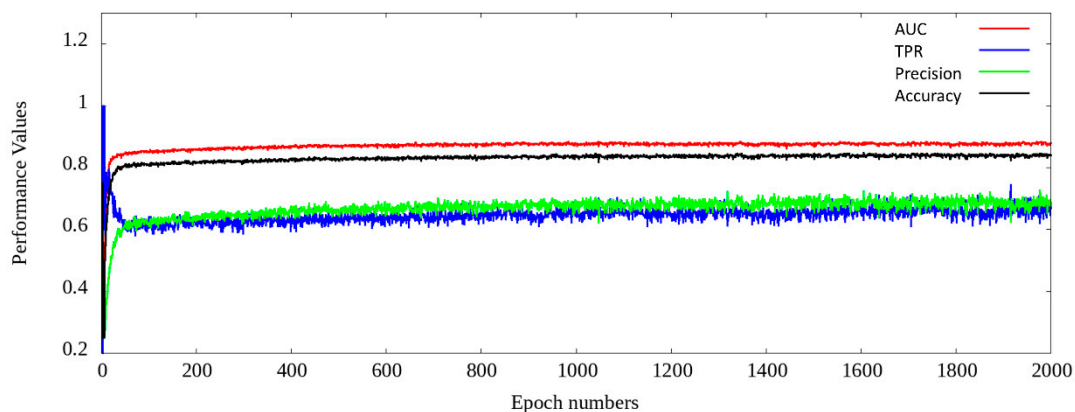

**B** Binary classification, molecular vector represent amino acid with pocket cutoff of 0.8nm

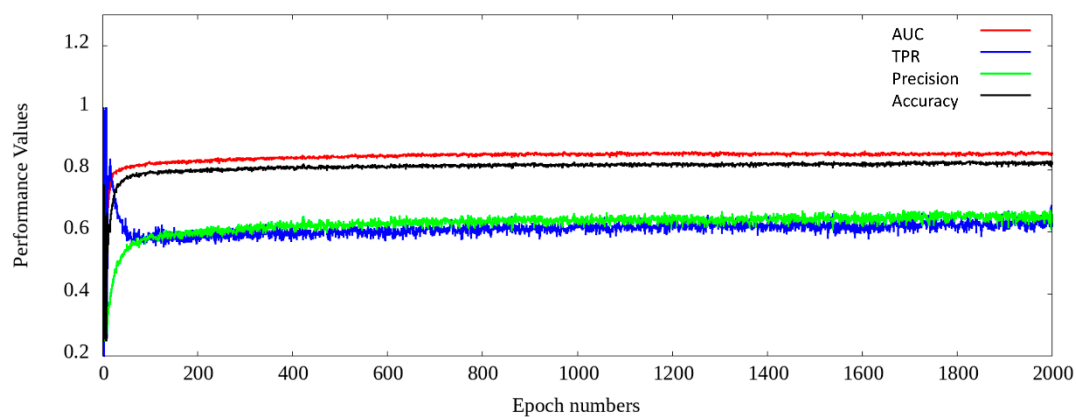

**Figure S1.** The DeepBindGCN\_BC performance over the 2000 epoch training. A. pocket cutoff using 0.6 nm, B, pocket cutoff using 0.8 nm. The amino acid in the pocket is represented as a molecular vector.

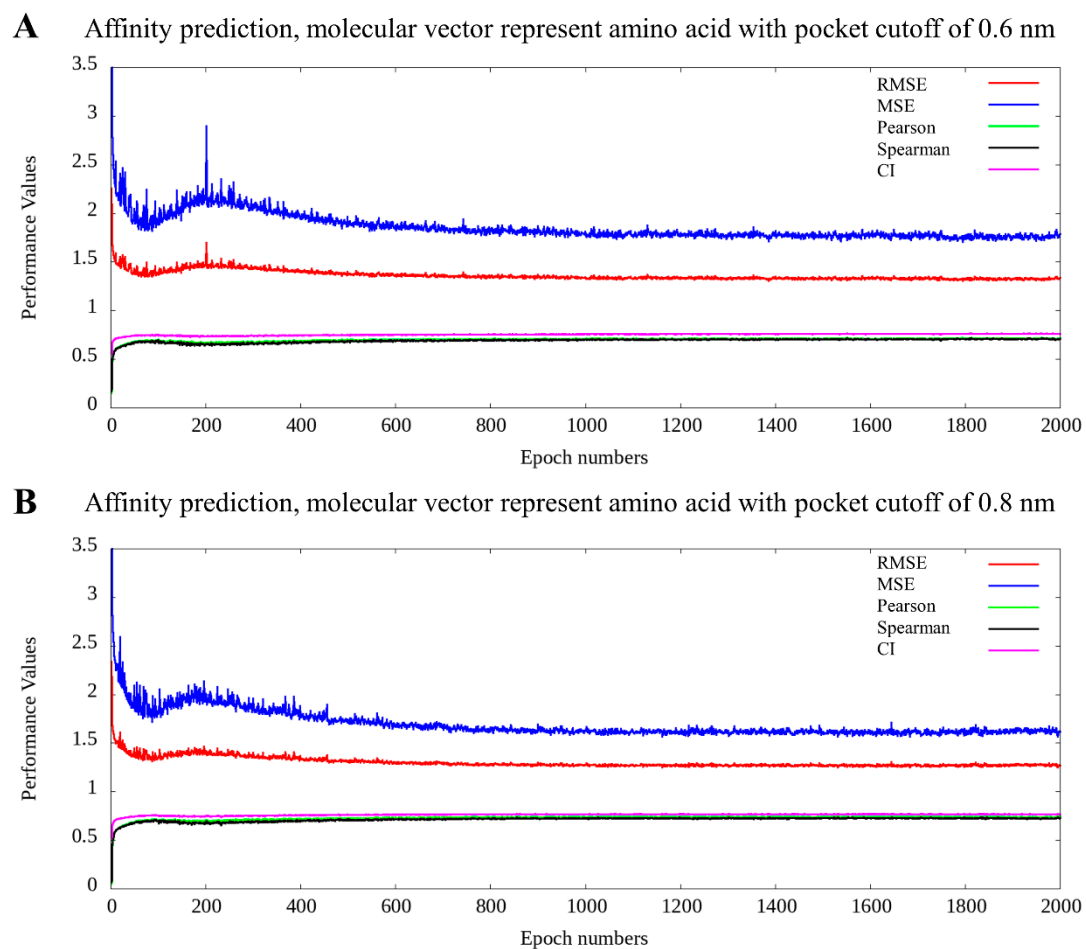

**Figure S2.** The DeepBindGCN\_RG performance over the 2000 epoch training. A. pocket cutoff using 0.6 nm, B, pocket cutoff using 0.8 nm. The amino acids in the pocket are represented as molecular vectors.

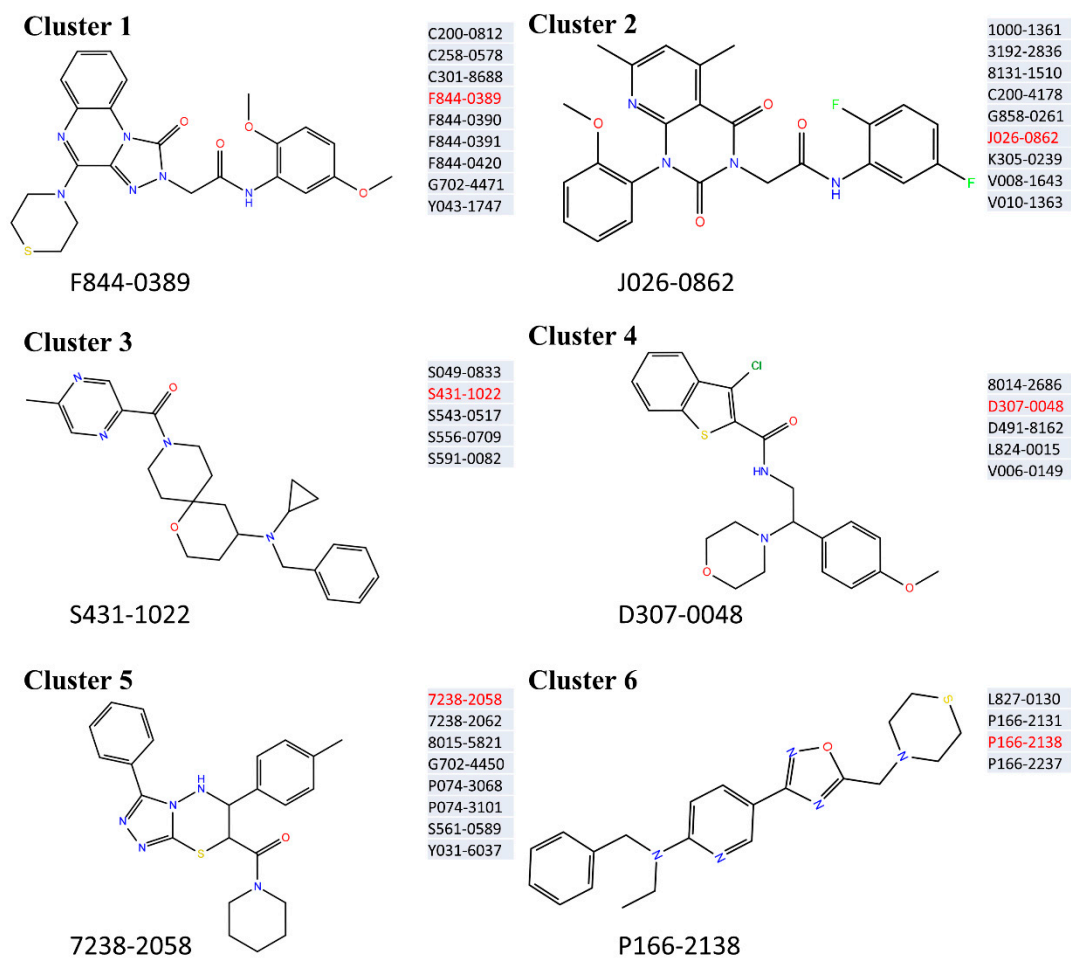

**Figure S3.** The six clusters and corresponding representative cluster center structure of top predicted candidates from DeepBindGCN\_BC and DeepBindGCN\_RG for the TIPE3.

Cluster 1

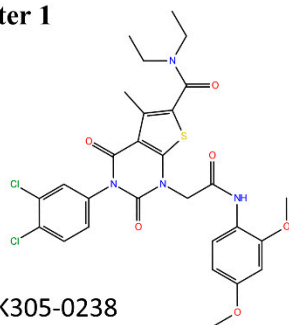

|           |           |
|-----------|-----------|
| 4296-0364 | L558-0642 |
| F834-0590 | L558-0647 |
| K286-3615 | L858-0205 |
| K286-3702 | L880-0048 |
| K286-3705 | L880-0055 |
| K305-0042 | L880-0269 |
| K305-0044 | L880-0285 |
| K305-0045 | L880-0286 |
| K305-0238 | L880-0296 |
| K305-0239 | L880-0302 |
| K305-0345 | V008-7569 |

Cluster 2

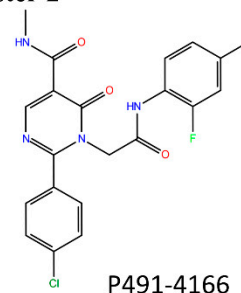

|           |
|-----------|
| P491-4131 |
| P491-4166 |
| P491-4168 |
| P491-4650 |

Cluster 3

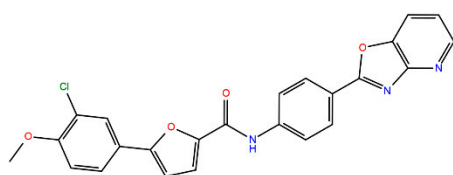

|           |
|-----------|
| 0957-0218 |
| 2265-3136 |
| 4376-0091 |
| 8015-4975 |
| D725-0060 |
| D725-0206 |
| F940-0602 |
| G822-0592 |
| L539-0325 |
| P181-0863 |
| V006-3679 |

Cluster 4

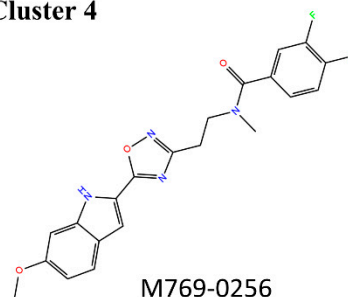

|           |
|-----------|
| M769-0256 |
| M769-0266 |
| M769-0268 |
| M769-0271 |
| M769-0273 |
| M769-0279 |
| M769-0296 |
| M769-0298 |
| M769-1241 |
| M769-1402 |
| M769-1425 |

Cluster 5

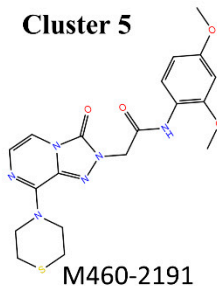

|           |           |           |           |
|-----------|-----------|-----------|-----------|
| 1890-0396 | C163-0031 | G833-0486 | M520-0729 |
| 3209-0884 | C163-0043 | G856-8308 | M520-0742 |
| 3209-0888 | C163-0098 | G856-8325 | P392-2143 |
| 3852-0327 | C200-0812 | J093-0740 | P704-0166 |
| 6049-1532 | C200-0820 | L855-0058 | S556-0709 |
| 6049-2376 | C226-4308 | L977-1354 | SB33-0022 |
| 7418-0675 | C301-3800 | M460-2191 | V001-2516 |
| 7418-1976 | E859-0698 | M460-2223 | V006-3291 |
| 7840-3923 | F019-0136 | M460-2243 | V008-6168 |
| 8007-8597 | F431-0440 | M460-2244 | V010-3729 |
| 8010-2605 | F506-0470 | M460-2265 | V030-9758 |
| 8510-0254 | G281-2300 | M460-3727 | Y020-7930 |
| C163-0025 | G281-2304 | M520-0662 | Y043-4611 |

Cluster 6

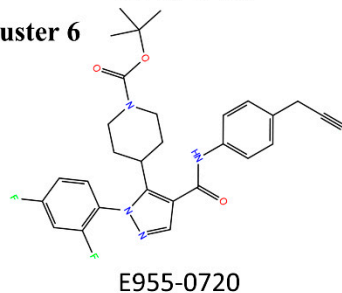

|           |
|-----------|
| E955-0152 |
| E955-0436 |
| E955-0720 |
| E955-0805 |
| E955-1004 |
| E955-1055 |
| E955-1146 |
| E955-1572 |
| E955-1714 |

**Figure S4.** The six clusters and corresponding representative cluster center structure of top predicted candidates from DeepBindGCN\_BC and DeepBindGCN\_RG for the PD-L1.



**A** P491-4166

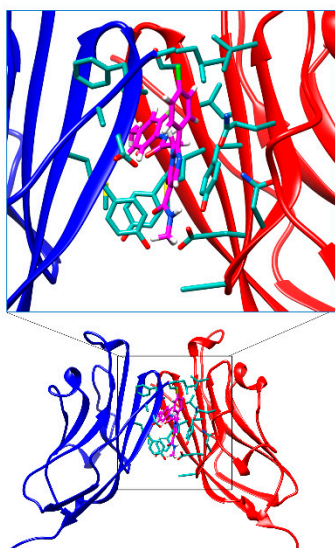

**B** D725-0060

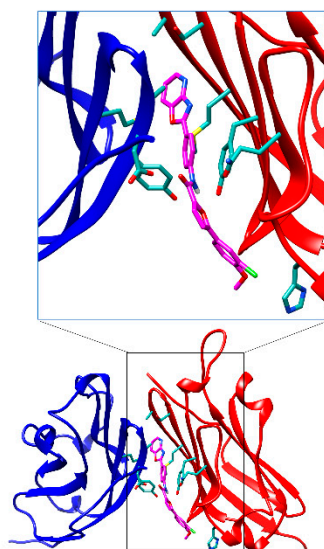

**C** M769-0256

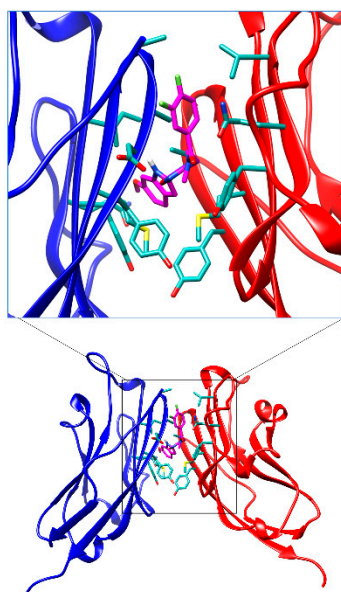

**D** M460-2191

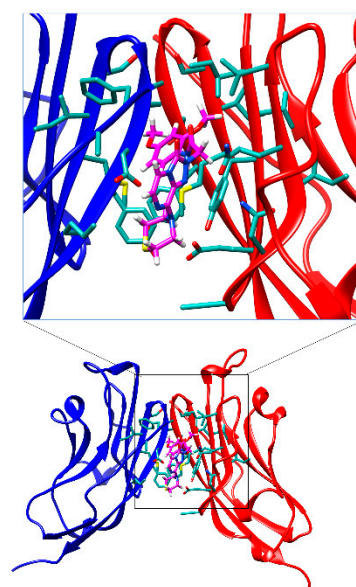

**Figure S5.** The snapshot and 2D plot of PD-L1 with representative cluster center compounds from docking.

**A**    TIPE3

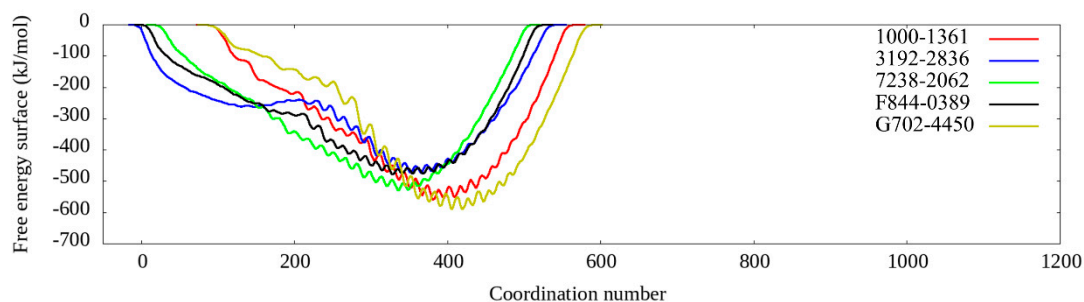

**B**    PD-L1 dimer

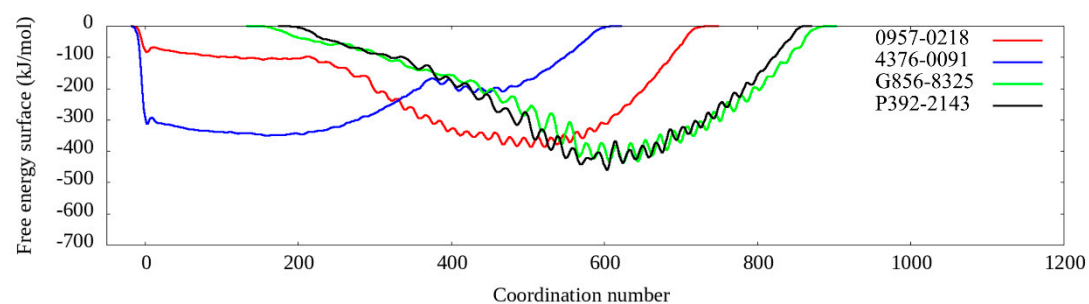

**Figure S6.** The calculated free energy landscape from metadynamics simulation for those candidates that have favorable binding with the given target. A, The calculated free energy landscape for TIPE3 with selected candidates; B, The calculated free energy landscape for PD-L1 with selected candidates.

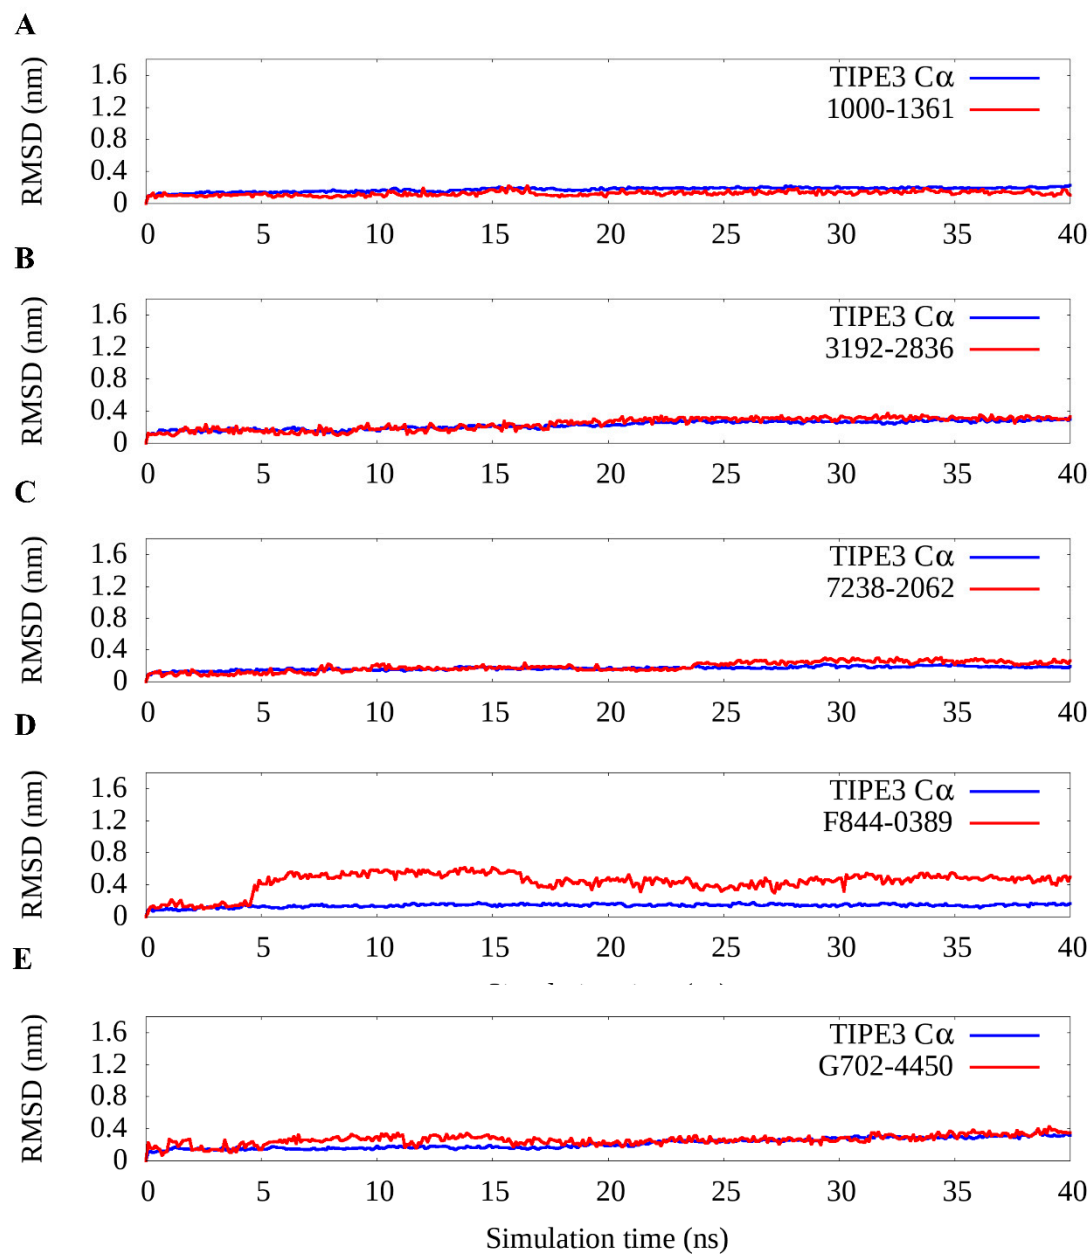

**Figure S7.** (A–E) The RMSD value of selected compounds with the TIPE3 during the MD simulation.

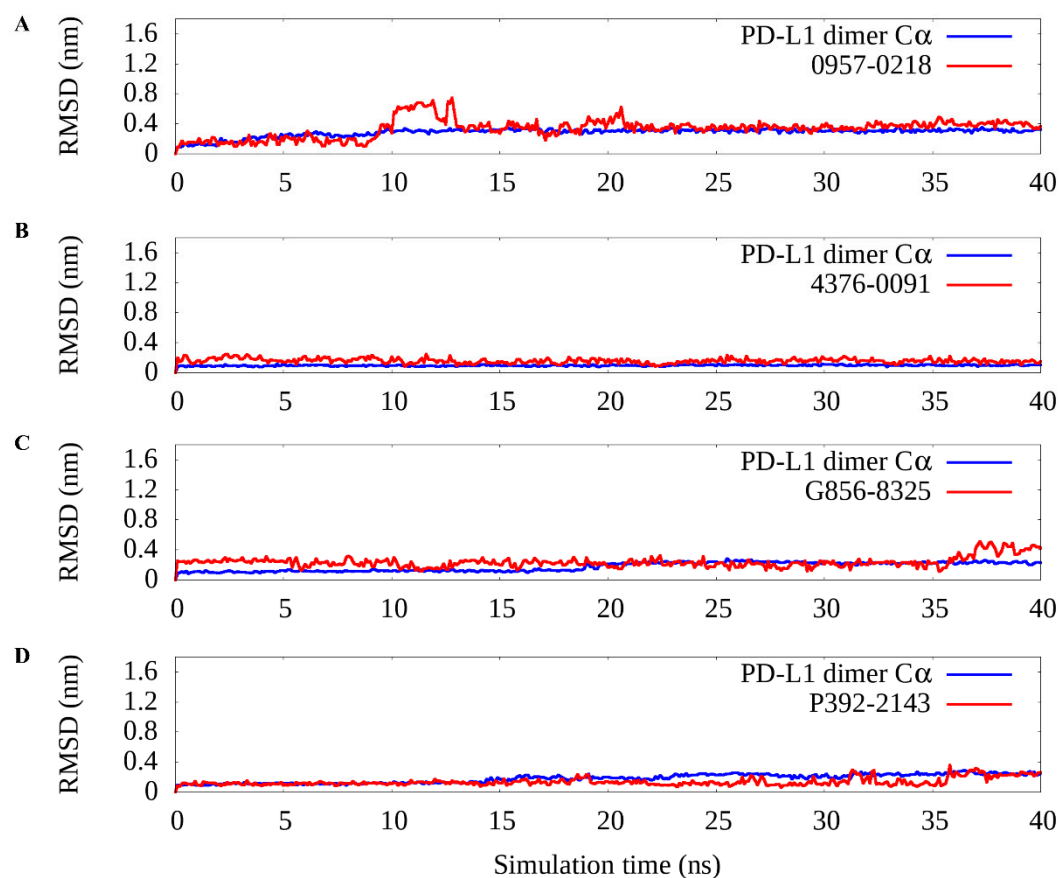

**Figure S8.** (A–D) The RMSD value of selected compounds with the PD-L1 during the MD simulation.



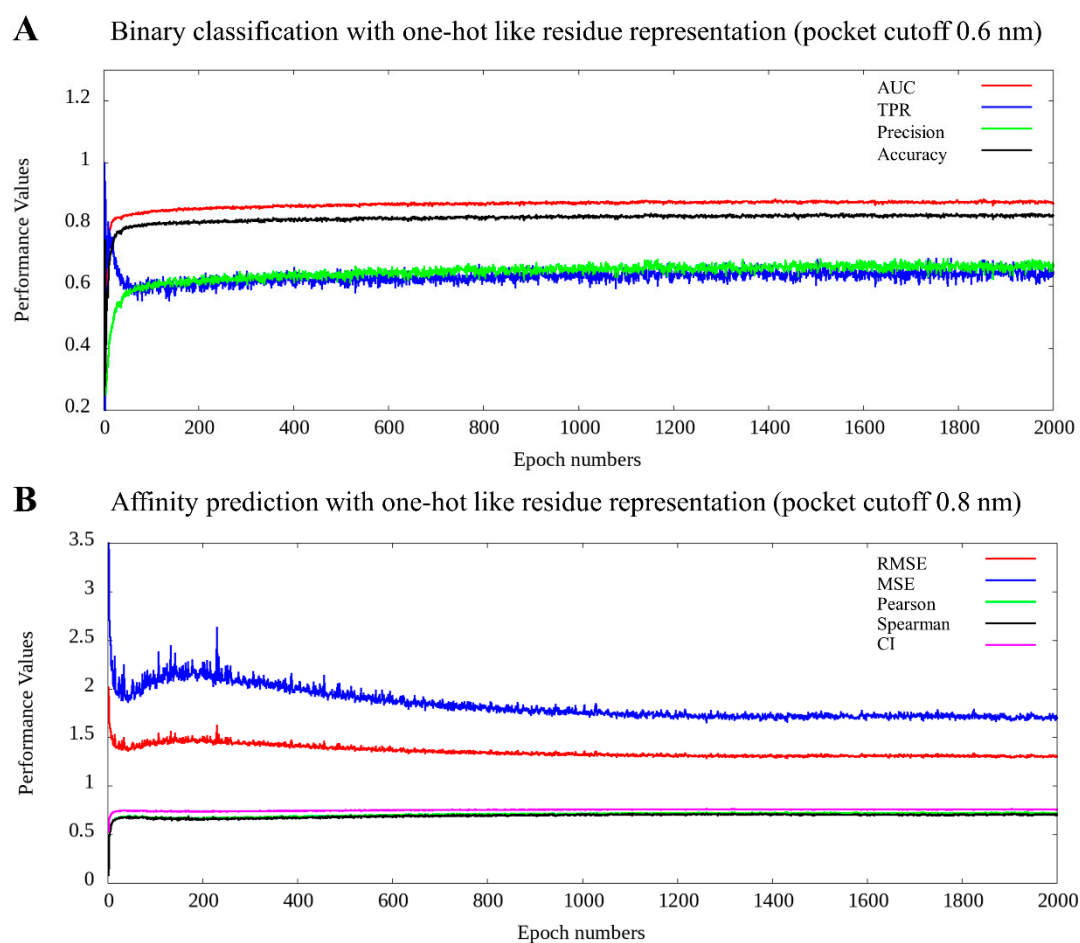

**Figure S10.** The performance of binary classification and affinity prediction models with onehot like residue representation over the 2000 epoch training. A. pocket cutoff using 0.6nm, B, pocket cutoff using 0.8nm. The amino acid in the pocket is represented as onehot representation.

**Supplementary Tables:****Table S1.** Performance of DeepBindGCN\_BC on the test set during the training with epoch interval 100.

| Pocket cutoff | Epoch | AUC    | TPR    | Precision | Accuracy |
|---------------|-------|--------|--------|-----------|----------|
| 0.6nm         | 100   | 0.8493 | 0.6408 | 0.6096    | 0.8076   |
|               | 200   | 0.8589 | 0.6138 | 0.6418    | 0.8178   |
|               | 300   | 0.8626 | 0.6508 | 0.6246    | 0.8149   |
|               | 400   | 0.8705 | 0.6254 | 0.6737    | 0.8306   |
|               | 500   | 0.8676 | 0.6367 | 0.6524    | 0.8244   |
|               | 600   | 0.8682 | 0.6350 | 0.6626    | 0.8279   |
|               | 700   | 0.8750 | 0.6233 | 0.6831    | 0.8335   |
|               | 800   | 0.8745 | 0.6508 | 0.6588    | 0.8284   |
|               | 900   | 0.8789 | 0.6296 | 0.6837    | 0.8346   |
|               | 1000  | 0.8767 | 0.6400 | 0.6802    | 0.8348   |
|               | 1100  | 0.8703 | 0.6438 | 0.6747    | 0.8333   |
|               | 1200  | 0.8744 | 0.6483 | 0.6801    | 0.8358   |
|               | 1300  | 0.8719 | 0.6704 | 0.6632    | 0.8325   |
|               | 1400  | 0.8755 | 0.6579 | 0.6765    | 0.8358   |
|               | 1500  | 0.8790 | 0.6338 | 0.7071    | 0.8428   |
|               | 1600  | 0.8752 | 0.6488 | 0.6929    | 0.8403   |
|               | 1700  | 0.8775 | 0.6625 | 0.6780    | 0.8370   |
|               | 1800  | 0.8738 | 0.6567 | 0.6915    | 0.8409   |
|               | 1900  | 0.8778 | 0.6667 | 0.6917    | 0.8424   |
|               | 2000  | 0.8788 | 0.6863 | 0.6767    | 0.8396   |
| 0.8nm         | 100   | 0.8222 | 0.5933 | 0.5901    | 0.7953   |
|               | 200   | 0.8275 | 0.6021 | 0.5879    | 0.7950   |
|               | 300   | 0.8367 | 0.5988 | 0.6186    | 0.8074   |
|               | 400   | 0.8401 | 0.5875 | 0.6242    | 0.8084   |
|               | 500   | 0.8403 | 0.6013 | 0.6304    | 0.8122   |
|               | 600   | 0.8454 | 0.5904 | 0.6326    | 0.8119   |
|               | 700   | 0.8443 | 0.6138 | 0.6236    | 0.8108   |
|               | 800   | 0.8493 | 0.6154 | 0.6280    | 0.8127   |
|               | 900   | 0.8513 | 0.6142 | 0.6420    | 0.8179   |
|               | 1000  | 0.8493 | 0.6154 | 0.6422    | 0.8181   |
|               | 1100  | 0.8502 | 0.6171 | 0.6329    | 0.8148   |
|               | 1200  | 0.8559 | 0.6088 | 0.6543    | 0.8218   |
|               | 1300  | 0.8560 | 0.6250 | 0.6394    | 0.8181   |
|               | 1400  | 0.8492 | 0.6300 | 0.6340    | 0.8166   |
|               | 1500  | 0.8539 | 0.6079 | 0.6479    | 0.8194   |
|               | 1600  | 0.8550 | 0.6238 | 0.6531    | 0.8231   |
|               | 1700  | 0.8517 | 0.6017 | 0.6600    | 0.8229   |
|               | 1800  | 0.8489 | 0.6154 | 0.6527    | 0.8220   |
|               | 1900  | 0.8546 | 0.6042 | 0.6648    | 0.8249   |

|      |        |        |        |        |
|------|--------|--------|--------|--------|
| 2000 | 0.8537 | 0.6175 | 0.6552 | 0.8231 |
|------|--------|--------|--------|--------|



**Table S2.** Performance of DeepBindGCN\_RG on test set during the training with epoch interval 100.

| Pocket cutoff | Epoch | Rmse:  | Mse    | Pearson | Spearman | CI     |
|---------------|-------|--------|--------|---------|----------|--------|
| 0.6nm         | 100   | 1.3717 | 1.8816 | 0.7040  | 0.6968   | 0.7550 |
|               | 200   | 1.4645 | 2.1449 | 0.6675  | 0.6524   | 0.7373 |
|               | 300   | 1.4335 | 2.0550 | 0.6813  | 0.6684   | 0.7437 |
|               | 400   | 1.4051 | 1.9744 | 0.6875  | 0.6725   | 0.7456 |
|               | 500   | 1.3681 | 1.8716 | 0.6961  | 0.6860   | 0.7509 |
|               | 600   | 1.3574 | 1.8426 | 0.7025  | 0.6915   | 0.7536 |
|               | 700   | 1.3526 | 1.8296 | 0.7043  | 0.6927   | 0.7540 |
|               | 800   | 1.3489 | 1.8195 | 0.7042  | 0.6949   | 0.7553 |
|               | 900   | 1.3681 | 1.8717 | 0.7095  | 0.7003   | 0.7572 |
|               | 1000  | 1.3308 | 1.7709 | 0.7108  | 0.7034   | 0.7591 |
|               | 1100  | 1.3293 | 1.7670 | 0.7114  | 0.7038   | 0.7592 |
|               | 1200  | 1.3417 | 1.8001 | 0.7084  | 0.7025   | 0.7585 |
|               | 1300  | 1.3277 | 1.7628 | 0.7103  | 0.7025   | 0.7585 |
|               | 1400  | 1.3483 | 1.8179 | 0.7067  | 0.6991   | 0.7573 |
|               | 1500  | 1.3310 | 1.7715 | 0.7096  | 0.7030   | 0.7595 |
|               | 1600  | 1.3291 | 1.7666 | 0.7118  | 0.7052   | 0.7599 |
|               | 1700  | 1.3318 | 1.7738 | 0.7111  | 0.7043   | 0.7603 |
|               | 1800  | 1.3327 | 1.7761 | 0.7106  | 0.7047   | 0.7602 |
|               | 1900  | 1.3277 | 1.7627 | 0.7138  | 0.7067   | 0.7609 |
|               | 2000  | 1.3361 | 1.7852 | 0.7141  | 0.7098   | 0.7628 |
| 0.8nm         | 100   | 1.3141 | 1.7270 | 0.7153  | 0.7137   | 0.7604 |
|               | 200   | 1.3331 | 1.7772 | 0.7192  | 0.7062   | 0.7572 |
|               | 300   | 1.2859 | 1.6534 | 0.7392  | 0.7256   | 0.7677 |
|               | 400   | 1.2966 | 1.6810 | 0.7276  | 0.7122   | 0.7620 |
|               | 500   | 1.2672 | 1.6059 | 0.7413  | 0.7311   | 0.7702 |
|               | 600   | 1.2465 | 1.5538 | 0.7497  | 0.7396   | 0.7752 |
|               | 700   | 1.2558 | 1.5770 | 0.7423  | 0.7309   | 0.7714 |
|               | 800   | 1.2201 | 1.4885 | 0.7580  | 0.7463   | 0.7779 |
|               | 900   | 1.2135 | 1.4725 | 0.7560  | 0.7498   | 0.7786 |
|               | 1000  | 1.2039 | 1.4494 | 0.7580  | 0.7500   | 0.7796 |
|               | 1100  | 1.2298 | 1.5124 | 0.7467  | 0.7393   | 0.7737 |
|               | 1200  | 1.1914 | 1.4195 | 0.7617  | 0.7475   | 0.7789 |
|               | 1300  | 1.1991 | 1.4378 | 0.7574  | 0.7448   | 0.7775 |
|               | 1400  | 1.2004 | 1.4410 | 0.7570  | 0.7446   | 0.7778 |
|               | 1500  | 1.2039 | 1.4494 | 0.7563  | 0.7435   | 0.7770 |
|               | 1600  | 1.2184 | 1.4844 | 0.7484  | 0.7370   | 0.7726 |
|               | 1700  | 1.2162 | 1.4791 | 0.7497  | 0.7400   | 0.7752 |
|               | 1800  | 1.2176 | 1.4825 | 0.7501  | 0.7372   | 0.7741 |
|               | 1900  | 1.2083 | 1.4599 | 0.7518  | 0.7398   | 0.7745 |
|               | 2000  | 1.2107 | 1.4657 | 0.7518  | 0.7410   | 0.7756 |

**Table S3.** The performance of DeepBindGCN\_BC (pocket cutoff 0.6 nm) on the DUD.E dataset.

| PDBID | AUC    | TPR    | Precision | Accuracy | MCC     | data_size | pos_size | neg_size |
|-------|--------|--------|-----------|----------|---------|-----------|----------|----------|
| 3BWM  | 1.0000 | 0.8537 | 1.0000    | 0.8571   | 0.3492  | 42        | 41       | 1        |
| 1ZW5  | 0.5765 | 0.0118 | 1.0000    | 0.2500   | 0.0535  | 112       | 85       | 27       |
| 2AA2  | 0.7052 | 0.2217 | 1.0000    | 0.2290   | 0.0515  | 214       | 212      | 2        |
| 3KRJ  | 0.9378 | 0.7558 | 1.0000    | 0.7589   | 0.1944  | 394       | 389      | 5        |
| 3L3M  | 0.8029 | 0.5301 | 1.0000    | 0.5355   | 0.1125  | 1057      | 1045     | 12       |
| 2OWB  | 0.4205 | 0.0044 | 1.0000    | 0.1722   | 0.0273  | 273       | 227      | 46       |
| 3KBA  | 0.1230 | 0.3615 | 0.9975    | 0.3611   | -0.0396 | 1127      | 1126     | 1        |
| 3CCW  | 0.7652 | 0.5878 | 0.9969    | 0.5920   | 0.1124  | 549       | 541      | 8        |
| 3PBL  | 0.6470 | 0.8780 | 0.9954    | 0.8748   | 0.0565  | 2228      | 2214     | 14       |
| 3BQD  | 0.5618 | 0.7802 | 0.9949    | 0.7776   | 0.0212  | 998       | 992      | 6        |
| 3G0E  | 0.8057 | 0.6887 | 0.9924    | 0.6899   | 0.1338  | 387       | 379      | 8        |
| 830C  | 0.6763 | 0.7968 | 0.9902    | 0.7922   | 0.0906  | 1670      | 1644     | 26       |
| 2CNK  | 0.7350 | 0.1928 | 0.9891    | 0.2495   | 0.1118  | 509       | 472      | 37       |
| 1XL2  | 0.8517 | 0.4639 | 0.9887    | 0.4910   | 0.1817  | 1607      | 1511     | 96       |
| 3EQH  | 0.6921 | 0.2403 | 0.9867    | 0.2656   | 0.0704  | 320       | 308      | 12       |
| 2ZEC  | 0.6770 | 0.3122 | 0.9857    | 0.3544   | 0.1373  | 237       | 221      | 16       |
| 2AM9  | 0.5055 | 0.8199 | 0.9835    | 0.8094   | 0.0103  | 1107      | 1088     | 19       |
| 1BCD  | 0.4933 | 0.1675 | 0.9822    | 0.1753   | -0.0191 | 2002      | 1976     | 26       |
| 3D0E  | 0.8424 | 0.6498 | 0.9809    | 0.6692   | 0.3015  | 260       | 237      | 23       |
| 2OI0  | 0.5505 | 0.5676 | 0.9808    | 0.5665   | 0.0250  | 1384      | 1353     | 31       |
| 1MV9  | 0.6055 | 0.8322 | 0.9806    | 0.8199   | 0.0465  | 311       | 304      | 7        |
| 3LPB  | 0.4851 | 0.3690 | 0.9789    | 0.3760   | 0.0112  | 258       | 252      | 6        |
| 2QD9  | 0.6189 | 0.8174 | 0.9758    | 0.8036   | 0.0902  | 2291      | 2218     | 73       |
| 3HMM  | 0.5769 | 0.7489 | 0.9670    | 0.7314   | -0.0420 | 242       | 235      | 7        |
| 2H7L  | 0.5769 | 0.7489 | 0.9670    | 0.7314   | -0.0420 | 242       | 235      | 7        |
| 3L5D  | 0.8266 | 0.9133 | 0.9665    | 0.8892   | 0.3445  | 641       | 600      | 41       |
| 3EML  | 0.6269 | 0.4002 | 0.9665    | 0.4221   | 0.0847  | 3288      | 3096     | 192      |
| 2FSZ  | 0.8597 | 0.9173 | 0.9661    | 0.8948   | 0.4686  | 1492      | 1366     | 126      |
| 2AYW  | 0.7089 | 0.2182 | 0.9638    | 0.2946   | 0.1154  | 1093      | 976      | 117      |
| 3FRJ  | 0.4572 | 0.1207 | 0.9633    | 0.1446   | -0.0093 | 899       | 870      | 29       |
| 2GTK  | 0.3925 | 0.7785 | 0.9626    | 0.7564   | -0.0550 | 1334      | 1291     | 43       |
| 3LQ8  | 0.5867 | 0.6042 | 0.9621    | 0.6006   | 0.0583  | 353       | 336      | 17       |
| 1SJ0  | 0.8025 | 0.7057 | 0.9617    | 0.7078   | 0.2678  | 1451      | 1315     | 136      |
| 3BGS  | 0.5118 | 0.8109 | 0.9602    | 0.7863   | 0.0055  | 248       | 238      | 10       |
| 3CJO  | 0.6768 | 0.5109 | 0.9592    | 0.5377   | 0.1784  | 305       | 276      | 29       |
| 3CHP  | 0.6478 | 0.8295 | 0.9567    | 0.8038   | 0.1265  | 367       | 346      | 21       |
| 2P2I  | 0.6366 | 0.6983 | 0.9541    | 0.6840   | 0.0751  | 2462      | 2320     | 142      |
| 1UDT  | 0.7414 | 0.7536 | 0.9531    | 0.7413   | 0.2310  | 1063      | 970      | 93       |
| 3D4Q  | 0.7178 | 0.8202 | 0.9524    | 0.7971   | 0.2392  | 345       | 317      | 28       |
| 3KL6  | 0.5061 | 0.4785 | 0.9492    | 0.4817   | 0.0082  | 3340      | 3164     | 176      |

|      |        |        |        |        |         |      |      |     |
|------|--------|--------|--------|--------|---------|------|------|-----|
| 2ETR | 0.5402 | 0.6804 | 0.9490 | 0.6667 | 0.0766  | 234  | 219  | 15  |
| 1YPE | 0.6432 | 0.4269 | 0.9485 | 0.4636 | 0.1341  | 2541 | 2286 | 255 |
| 3HL5 | 0.5043 | 0.7300 | 0.9481 | 0.7103 | 0.0873  | 107  | 100  | 7   |
| 3BKL | 0.6001 | 0.6494 | 0.9479 | 0.6382 | 0.0621  | 868  | 813  | 55  |
| 3BIZ | 0.5069 | 0.9005 | 0.9476 | 0.8602 | 0.1302  | 236  | 221  | 15  |
| 2P54 | 0.6506 | 0.8819 | 0.9469 | 0.8441 | 0.1672  | 1174 | 1092 | 82  |
| 1SQT | 0.4882 | 0.1387 | 0.9455 | 0.2220 | 0.0640  | 419  | 375  | 44  |
| 2VT4 | 0.5656 | 0.4779 | 0.9429 | 0.5014 | 0.1192  | 726  | 657  | 69  |
| 2HZI | 0.8138 | 0.6895 | 0.9400 | 0.7059 | 0.3660  | 493  | 409  | 84  |
| 3CQW | 0.6763 | 0.6037 | 0.9367 | 0.5991 | 0.0845  | 641  | 588  | 53  |
| 1B9V | 0.5898 | 0.5463 | 0.9333 | 0.5531 | 0.0962  | 226  | 205  | 21  |
| 2I78 | 0.5760 | 0.8865 | 0.9330 | 0.8364 | 0.0924  | 2194 | 2027 | 167 |
| 2RGP | 0.8190 | 0.7463 | 0.9322 | 0.7538 | 0.4423  | 2027 | 1620 | 407 |
| 1H00 | 0.6143 | 0.6033 | 0.9302 | 0.5992 | 0.0957  | 1462 | 1326 | 136 |
| 3G6Z | 0.6409 | 0.8668 | 0.9299 | 0.8221 | 0.2480  | 444  | 398  | 46  |
| 3F07 | 0.7875 | 0.8307 | 0.9298 | 0.8112 | 0.4865  | 392  | 319  | 73  |
| 2OF2 | 0.6871 | 0.5484 | 0.9265 | 0.5736 | 0.1923  | 1067 | 919  | 148 |
| 3E37 | 0.5940 | 0.5236 | 0.9249 | 0.5242 | 0.0298  | 1591 | 1459 | 132 |
| 1LI4 | 0.5538 | 0.6769 | 0.9167 | 0.6429 | -0.0683 | 70   | 65   | 5   |
| 2ICA | 0.6365 | 0.8025 | 0.9155 | 0.7507 | -0.0174 | 353  | 324  | 29  |
| 1C8K | 0.5284 | 0.2530 | 0.9130 | 0.2889 | -0.0201 | 90   | 83   | 7   |
| 3NXO | 0.4664 | 0.7588 | 0.8970 | 0.7023 | -0.0601 | 1253 | 1136 | 117 |
| 2ZNP | 0.5381 | 0.8696 | 0.8960 | 0.7917 | -0.0377 | 792  | 713  | 79  |
| 3MAX | 0.6439 | 0.8160 | 0.8915 | 0.7537 | 0.1293  | 475  | 413  | 62  |
| 2HV5 | 0.4378 | 0.2261 | 0.8896 | 0.2895 | 0.0062  | 684  | 606  | 78  |
| 1LRU | 0.2677 | 0.0925 | 0.8889 | 0.1215 | -0.1082 | 181  | 173  | 8   |
| 3BZ3 | 0.2466 | 0.8713 | 0.8889 | 0.7857 | -0.1196 | 112  | 101  | 11  |
| 2OJ9 | 0.5570 | 0.4316 | 0.8703 | 0.4732 | 0.0846  | 448  | 373  | 75  |
| 3EL8 | 0.6774 | 0.7549 | 0.8689 | 0.7071 | 0.2130  | 1560 | 1273 | 287 |
| 2ZDT | 0.4340 | 0.5495 | 0.8605 | 0.5156 | -0.1428 | 225  | 202  | 23  |
| 1E66 | 0.6548 | 0.5015 | 0.8551 | 0.5504 | 0.1826  | 2122 | 1635 | 487 |
| 1NJS | 0.5897 | 0.9808 | 0.8500 | 0.8438 | 0.3721  | 64   | 52   | 12  |
| 3LAN | 0.5831 | 0.6461 | 0.8490 | 0.6141 | 0.0877  | 1459 | 1201 | 258 |
| 1Q4X | 0.1732 | 0.5610 | 0.8415 | 0.5127 | -0.2101 | 275  | 246  | 29  |
| 3ODU | 0.7184 | 0.8372 | 0.8372 | 0.7544 | 0.3372  | 57   | 43   | 14  |
| 3NY8 | 0.4513 | 0.5622 | 0.8325 | 0.5373 | -0.0230 | 737  | 619  | 118 |
| 2NNQ | 0.8364 | 0.9362 | 0.8000 | 0.7778 | 0.3251  | 63   | 47   | 16  |
| 3M2W | 0.6844 | 0.6848 | 0.7826 | 0.6491 | 0.2384  | 265  | 184  | 81  |
| 1S3B | 0.4886 | 0.8377 | 0.7812 | 0.6906 | 0.0092  | 585  | 456  | 129 |
| 2IOE | 0.6469 | 0.6141 | 0.7793 | 0.6046 | 0.1795  | 521  | 368  | 153 |
| 2OJG | 0.5857 | 0.8148 | 0.7765 | 0.7069 | 0.2821  | 116  | 81   | 35  |
| 1SYN | 0.3875 | 0.2786 | 0.7724 | 0.3054 | -0.1812 | 465  | 402  | 63  |
| 1J4H | 0.5961 | 0.7818 | 0.7500 | 0.6609 | 0.1546  | 233  | 165  | 68  |
| 1UYG | 0.3655 | 0.6705 | 0.7375 | 0.5575 | -0.1548 | 113  | 88   | 25  |

|      |        |        |        |        |         |      |      |      |
|------|--------|--------|--------|--------|---------|------|------|------|
| 2E1W | 0.5014 | 0.7404 | 0.7333 | 0.6233 | 0.0743  | 146  | 104  | 42   |
| 3C4F | 0.5703 | 0.6789 | 0.7115 | 0.5877 | 0.0609  | 473  | 327  | 146  |
| 3LN1 | 0.3907 | 0.2277 | 0.7099 | 0.3114 | -0.1247 | 2174 | 1730 | 444  |
| 1D3G | 0.4088 | 0.2247 | 0.7083 | 0.3746 | -0.0149 | 315  | 227  | 88   |
| 1KVO | 0.2119 | 0.0909 | 0.6957 | 0.1211 | -0.3277 | 190  | 176  | 14   |
| 1W7X | 0.2159 | 0.1508 | 0.6866 | 0.1860 | -0.3103 | 344  | 305  | 39   |
| 3KGC | 0.3955 | 0.5123 | 0.6631 | 0.4702 | -0.1092 | 689  | 488  | 201  |
| 2V3F | 0.3983 | 0.4000 | 0.6471 | 0.4512 | -0.0424 | 82   | 55   | 27   |
| 2OYU | 0.5191 | 0.0976 | 0.6023 | 0.6745 | 0.1350  | 1613 | 543  | 1070 |
| 2AZR | 0.4730 | 0.0458 | 0.4815 | 0.3478 | -0.0906 | 437  | 284  | 153  |
| 3NF7 | 0.5717 | 0.6973 | 0.4388 | 0.5121 | 0.0841  | 453  | 185  | 268  |
| 1L2S | 0.6311 | 0.5510 | 0.4355 | 0.5714 | 0.1299  | 133  | 49   | 84   |
| 3NXU | 0.3981 | 0.3135 | 0.4241 | 0.4088 | -0.1733 | 570  | 303  | 267  |
| 1QW6 | 0.4563 | 0.0155 | 0.3846 | 0.1772 | -0.2046 | 395  | 322  | 73   |
| 1R9O | 0.3632 | 0.1172 | 0.3617 | 0.5078 | -0.0749 | 321  | 145  | 176  |
| 1VSO | 0.3137 | 0.4706 | 0.2712 | 0.3423 | -0.2617 | 371  | 136  | 235  |
| 2B8T | 0.4948 | 0.0000 | nan    | 0.5397 | 0.0000  | 126  | 58   | 68   |
| 3F9M | 0.5357 | 0.0000 | nan    | 0.0886 | 0.0000  | 158  | 144  | 14   |

**Table S4.** The performance of DeepBindGCN\_RG (pocket cutoff 0.8 nm) on the DUD.E dataset.

| PDBID | Rmse   | Mse    | Pearson | Spearman | CI     | data_size |
|-------|--------|--------|---------|----------|--------|-----------|
| 3BIZ  | 0.6866 | 0.4714 | 0.1794  | 0.1800   | 0.5570 | 221       |
| 2AZR  | 0.7134 | 0.5089 | 0.2293  | 0.2654   | 0.5903 | 284       |
| 1UYG  | 0.7880 | 0.6209 | 0.3155  | 0.2981   | 0.6089 | 88        |
| 3M2W  | 0.7958 | 0.6334 | 0.3754  | 0.3063   | 0.6073 | 184       |
| 3EQH  | 0.8114 | 0.6584 | 0.3547  | 0.3277   | 0.6159 | 308       |
| 2ETR  | 0.8119 | 0.6592 | 0.2780  | 0.2687   | 0.5961 | 219       |
| 3F9M  | 0.8177 | 0.6686 | 0.1705  | 0.1740   | 0.5611 | 144       |
| 1KVO  | 0.8184 | 0.6697 | 0.1789  | 0.1481   | 0.5510 | 176       |
| 1SQT  | 0.8194 | 0.6715 | 0.2473  | 0.2282   | 0.5777 | 375       |
| 3D0E  | 0.8439 | 0.7122 | 0.2704  | 0.2272   | 0.5797 | 237       |
| 3L5D  | 0.8480 | 0.7191 | 0.3180  | 0.3432   | 0.6187 | 600       |
| 1LRU  | 0.8956 | 0.8021 | 0.2213  | 0.2362   | 0.5805 | 173       |
| 3NF7  | 0.9010 | 0.8119 | 0.1790  | 0.1021   | 0.5353 | 185       |
| 3HMM  | 0.9035 | 0.8163 | 0.0380  | 0.0055   | 0.5010 | 235       |
| 2ICA  | 0.9056 | 0.8201 | 0.3269  | 0.3630   | 0.6210 | 324       |
| 2HZI  | 0.9088 | 0.8258 | 0.5412  | 0.5701   | 0.6958 | 409       |
| 3KGC  | 0.9121 | 0.8319 | -0.0222 | 0.0049   | 0.5013 | 488       |
| 2HV5  | 0.9258 | 0.8572 | 0.0512  | 0.0530   | 0.5178 | 606       |
| 3EL8  | 0.9303 | 0.8654 | 0.2629  | 0.2570   | 0.5875 | 1271      |
| 2OJG  | 0.9386 | 0.8810 | 0.5505  | 0.5713   | 0.7045 | 81        |
| 1D3G  | 0.9397 | 0.8831 | 0.0503  | 0.0742   | 0.5269 | 227       |
| 1BCD  | 0.9496 | 0.9017 | 0.3138  | 0.2846   | 0.5974 | 1976      |
| 2V3F  | 0.9621 | 0.9256 | 0.3420  | 0.2885   | 0.5987 | 55        |
| 3CCW  | 0.9665 | 0.9341 | 0.2556  | 0.2955   | 0.6004 | 541       |
| 2QD9  | 0.9730 | 0.9468 | 0.3492  | 0.3509   | 0.6196 | 2218      |
| 3KRJ  | 0.9770 | 0.9545 | 0.2654  | 0.2395   | 0.5826 | 389       |
| 3CQW  | 0.9779 | 0.9562 | 0.2804  | 0.2742   | 0.5933 | 588       |
| 2ZNP  | 0.9779 | 0.9564 | 0.1656  | 0.1517   | 0.5510 | 713       |
| 2OF2  | 0.9816 | 0.9635 | 0.2678  | 0.2355   | 0.5797 | 919       |
| 830C  | 0.9833 | 0.9668 | 0.2000  | 0.1883   | 0.5641 | 1644      |
| 3LAN  | 0.9854 | 0.9709 | 0.1809  | 0.1732   | 0.5596 | 1201      |
| 2OJ9  | 0.9918 | 0.9836 | 0.4426  | 0.4041   | 0.6388 | 373       |
| 3MAX  | 0.9936 | 0.9873 | 0.0286  | 0.0379   | 0.5130 | 413       |
| 1J4H  | 0.9965 | 0.9930 | -0.1850 | -0.1821  | 0.4383 | 165       |
| 3G0E  | 0.9967 | 0.9935 | 0.0037  | -0.0001  | 0.4966 | 379       |
| 1UDT  | 0.9988 | 0.9976 | 0.4255  | 0.4115   | 0.6419 | 970       |
| 3FRJ  | 1.0053 | 1.0107 | 0.3219  | 0.3558   | 0.6219 | 870       |
| 3LN1  | 1.0114 | 1.0229 | 0.1226  | 0.1406   | 0.5467 | 1724      |
| 2OYU  | 1.0176 | 1.0356 | 0.0176  | -0.0037  | 0.4991 | 542       |
| 1MV9  | 1.0219 | 1.0443 | -0.0451 | -0.0704  | 0.4770 | 302       |
| 2IOE  | 1.0248 | 1.0503 | 0.1046  | 0.0637   | 0.5211 | 368       |

|      |        |        |         |         |        |      |
|------|--------|--------|---------|---------|--------|------|
| 3G6Z | 1.0335 | 1.0681 | 0.3708  | 0.3808  | 0.6315 | 398  |
| 2P54 | 1.0358 | 1.0729 | -0.0942 | -0.0807 | 0.4732 | 1092 |
| 3C4F | 1.0446 | 1.0912 | 0.2187  | 0.2043  | 0.5695 | 327  |
| 2OI0 | 1.0482 | 1.0987 | 0.2427  | 0.2715  | 0.5921 | 1353 |
| 3BZ3 | 1.0552 | 1.1134 | 0.4161  | 0.2853  | 0.5996 | 101  |
| 2FSZ | 1.0561 | 1.1154 | 0.1761  | 0.1903  | 0.5635 | 1366 |
| 3L3M | 1.0662 | 1.1368 | 0.2866  | 0.2893  | 0.5993 | 1045 |
| 2I78 | 1.0709 | 1.1468 | 0.2367  | 0.2588  | 0.5878 | 2027 |
| 2NNQ | 1.0723 | 1.1498 | -0.0430 | 0.0930  | 0.5363 | 47   |
| 1W7X | 1.0802 | 1.1669 | -0.1663 | -0.1278 | 0.4586 | 305  |
| 1H00 | 1.0811 | 1.1687 | 0.1471  | 0.1481  | 0.5504 | 1326 |
| 3CJO | 1.1029 | 1.2165 | 0.0636  | 0.0040  | 0.5023 | 276  |
| 2GTK | 1.1122 | 1.2370 | 0.1875  | 0.1640  | 0.5554 | 1291 |
| 3E37 | 1.1124 | 1.2374 | 0.3073  | 0.2869  | 0.5971 | 1458 |
| 3LQ8 | 1.1194 | 1.2531 | 0.2573  | 0.2449  | 0.5826 | 336  |
| 2AA2 | 1.1231 | 1.2614 | 0.1248  | 0.1253  | 0.5415 | 212  |
| 3BQD | 1.1239 | 1.2632 | 0.2318  | 0.2555  | 0.5849 | 992  |
| 2P2I | 1.1261 | 1.2682 | 0.1844  | 0.1634  | 0.5554 | 2320 |
| 3KL6 | 1.1401 | 1.2998 | 0.3700  | 0.3639  | 0.6240 | 3164 |
| 3D4Q | 1.1457 | 1.3127 | 0.3178  | 0.3248  | 0.6096 | 317  |
| 3NXU | 1.1501 | 1.3226 | 0.1605  | 0.0808  | 0.5280 | 301  |
| 1LI4 | 1.1507 | 1.3240 | 0.1877  | 0.1849  | 0.5623 | 65   |
| 3KBA | 1.1584 | 1.3418 | 0.2295  | 0.1383  | 0.5450 | 1126 |
| 3BKL | 1.1908 | 1.4180 | 0.1231  | 0.1792  | 0.5606 | 813  |
| 3CHP | 1.2059 | 1.4543 | 0.2302  | 0.2447  | 0.5830 | 346  |
| 3F07 | 1.2073 | 1.4576 | 0.0710  | 0.0406  | 0.5144 | 319  |
| 2ZEC | 1.2095 | 1.4629 | 0.1899  | 0.2193  | 0.5701 | 221  |
| 2OWB | 1.2178 | 1.4830 | -0.0745 | 0.0285  | 0.5094 | 227  |
| 1SYN | 1.2312 | 1.5158 | 0.1394  | 0.1719  | 0.5579 | 402  |
| 2ZDT | 1.2347 | 1.5244 | 0.0851  | 0.0698  | 0.5228 | 202  |
| 3PBL | 1.2370 | 1.5302 | 0.2382  | 0.2288  | 0.5772 | 2212 |
| 3NY8 | 1.2412 | 1.5405 | 0.0940  | 0.0653  | 0.5224 | 612  |
| 2CNK | 1.2492 | 1.5606 | 0.1769  | 0.2146  | 0.5712 | 472  |
| 1VSO | 1.2498 | 1.5619 | -0.0160 | -0.0015 | 0.5018 | 136  |
| 1R9O | 1.2565 | 1.5787 | 0.0482  | -0.0124 | 0.4960 | 143  |
| 2AYW | 1.2632 | 1.5957 | 0.2006  | 0.2593  | 0.5870 | 975  |
| 1E66 | 1.2722 | 1.6184 | 0.0327  | 0.0638  | 0.5212 | 1635 |
| 3LPB | 1.2798 | 1.6379 | 0.2051  | 0.2103  | 0.5699 | 252  |
| 1XL2 | 1.2904 | 1.6652 | 0.2034  | 0.2053  | 0.5695 | 1510 |
| 2RGP | 1.3472 | 1.8149 | -0.0431 | -0.0291 | 0.4903 | 1620 |
| 1C8K | 1.3568 | 1.8408 | -0.2455 | -0.1909 | 0.4346 | 83   |
| 2AM9 | 1.3654 | 1.8643 | 0.0073  | 0.0170  | 0.5063 | 1086 |
| 1SJ0 | 1.3782 | 1.8994 | 0.2670  | 0.2893  | 0.5966 | 1315 |
| 1ZW5 | 1.3800 | 1.9045 | -0.0774 | -0.1686 | 0.4433 | 85   |

|         |        |        |         |         |        |          |
|---------|--------|--------|---------|---------|--------|----------|
| 1L2S    | 1.4351 | 2.0594 | 0.3744  | 0.2842  | 0.6015 | 49       |
| 1Q4X    | 1.5252 | 2.3263 | 0.1688  | 0.1581  | 0.5511 | 246      |
| 3EML    | 1.5608 | 2.4360 | 0.2073  | 0.1968  | 0.5664 | 3094     |
| 2E1W    | 1.5950 | 2.5441 | 0.0564  | 0.3352  | 0.6280 | 104      |
| 3BWM    | 1.6102 | 2.5927 | 0.5564  | 0.5051  | 0.6847 | 41       |
| 2VT4    | 1.6758 | 2.8084 | -0.0898 | -0.1105 | 0.4632 | 656      |
| 3NXO    | 1.7128 | 2.9336 | 0.1981  | 0.2121  | 0.5701 | 1136     |
| 3BGS    | 1.7390 | 3.0243 | 0.2201  | 0.2084  | 0.5703 | 238      |
| 1B9V    | 1.7737 | 3.1460 | -0.0314 | -0.0547 | 0.4799 | 205      |
| 3ODU    | 1.8775 | 3.5251 | -0.5341 | -0.5619 | 0.3000 | 43       |
| 1YPE    | 1.9325 | 3.7347 | 0.1137  | 0.0743  | 0.5261 | 2286     |
| 2H7L    | 1.9446 | 3.7814 | -0.0870 | -0.1644 | 0.4295 | 44       |
| 2B8T    | 2.0177 | 4.0713 | 0.4273  | 0.3408  | 0.6174 | 58       |
| 1QW6    | 2.1217 | 4.5014 | 0.0362  | 0.0522  | 0.5173 | 322      |
| 1NJS    | 2.2257 | 4.9538 | -0.0284 | -0.0702 | 0.4784 | 52       |
| 3HL5    | 2.3382 | 5.4670 | 0.1609  | 0.2207  | 0.5754 | 100      |
| 1S3B    | 2.6465 | 7.0038 | -0.1133 | -0.0348 | 0.4883 | 455      |
| Average | 1.1893 | 1.5440 | 0.1655  | 0.1626  | 0.5557 | 668.8725 |

**Table S5.** The top predicted candidates from DeepBindGCN\_BC and DeepBindGCN\_RG for the PD-L1 dimer.

| Compound ID | DeepBindGCN_BC | DeepBindGCN_RG | Schrödinger score |
|-------------|----------------|----------------|-------------------|
| M769-0298   | 1.0000         | 8.6240         | -7.0316           |
| 8510-0254   | 1.0000         | 8.6550         | -8.5080           |
| 7840-3923   | 1.0000         | 8.6628         | -8.9960           |
| K305-0238   | 1.0000         | 8.7054         | None              |
| M769-0279   | 1.0000         | 8.7637         | -8.0958           |
| E955-1714   | 1.0000         | 8.8704         | None              |
| K286-3615   | 1.0000         | 8.6922         | -6.2060           |
| P181-0863   | 1.0000         | 8.6661         | -7.0520           |
| E955-1146   | 1.0000         | 8.6790         | None              |
| 4376-0091   | 1.0000         | 8.6287         | -9.5048           |
| P491-4168   | 1.0000         | 8.7444         | -4.4769           |
| P491-4131   | 1.0000         | 8.7610         | -7.1448           |
| P491-4650   | 1.0000         | 8.6005         | -6.7671           |
| 4296-0364   | 1.0000         | 8.6700         | None              |
| L880-0302   | 1.0000         | 8.6232         | -5.7479           |
| C163-0031   | 1.0000         | 9.0551         | -7.3762           |
| F019-0136   | 1.0000         | 8.9002         | -5.3502           |
| E955-1004   | 1.0000         | 9.1059         | None              |
| K305-0239   | 1.0000         | 8.6878         | None              |
| E955-1572   | 1.0000         | 8.7449         | None              |
| V010-3729   | 1.0000         | 8.6142         | -9.5620           |
| C301-3800   | 1.0000         | 8.6228         | None              |
| G833-0486   | 0.9999         | 8.6179         | -8.4276           |
| 7418-0675   | 0.9999         | 8.6696         | -8.5439           |
| M769-0266   | 0.9999         | 8.9623         | -8.9308           |
| 0957-0218   | 0.9999         | 8.6395         | -9.1960           |
| M769-1241   | 0.9999         | 8.7414         | -9.2589           |
| K286-3705   | 0.9999         | 8.6012         | -5.9413           |
| L880-0055   | 0.9999         | 8.6495         | -7.0515           |
| E955-0152   | 0.9999         | 8.7428         | None              |
| 1890-0396   | 0.9999         | 8.6412         | -7.6736           |
| E955-0720   | 0.9999         | 8.6566         | None              |
| G281-2300   | 0.9999         | 8.6932         | -2.7696           |
| K305-0345   | 0.9999         | 8.6874         | None              |
| F506-0470   | 0.9999         | 8.6808         | None              |
| P491-4166   | 0.9999         | 8.6334         | -6.9812           |
| 6049-2376   | 0.9999         | 8.9938         | -6.9023           |
| M769-0273   | 0.9999         | 8.6812         | -8.5714           |
| L880-0048   | 0.9999         | 8.6338         | -5.7588           |
| M769-0271   | 0.9999         | 8.8637         | -6.3845           |



|           |        |        |         |
|-----------|--------|--------|---------|
| 3209-0888 | 0.9998 | 8.6119 | -6.8953 |
| M769-0296 | 0.9998 | 8.6302 | -7.7200 |
| M769-0268 | 0.9998 | 8.8134 | -4.7701 |
| M769-0256 | 0.9998 | 8.7986 | -8.5208 |
| F940-0602 | 0.9997 | 8.6125 | -8.9528 |
| D725-0206 | 0.9997 | 8.6493 | -8.5324 |
| G822-0592 | 0.9997 | 8.6111 | -5.7201 |
| C163-0098 | 0.9996 | 8.7322 | -8.3344 |
| 6049-1532 | 0.9996 | 8.7974 | -6.2506 |
| K305-0045 | 0.9996 | 8.6580 | None    |
| C200-0820 | 0.9996 | 8.7744 | None    |
| L558-0642 | 0.9995 | 8.6285 | None    |
| E859-0698 | 0.9995 | 8.6636 | -9.5635 |
| K286-3702 | 0.9995 | 8.6177 | None    |
| E955-0436 | 0.9995 | 8.7842 | None    |
| K305-0044 | 0.9994 | 8.7119 | None    |
| 3852-0327 | 0.9994 | 8.6303 | -8.1867 |
| 7418-1976 | 0.9994 | 8.6795 | -9.0079 |
| L558-0647 | 0.9994 | 8.7484 | None    |
| M460-2243 | 0.9993 | 8.6750 | -7.3363 |
| F834-0590 | 0.9993 | 8.6778 | -8.7997 |
| V001-2516 | 0.9992 | 8.6688 | -9.6745 |
| L880-0269 | 0.9992 | 8.6402 | -8.2118 |
| L880-0296 | 0.9992 | 8.7370 | -4.7731 |
| Y043-4611 | 0.9992 | 8.6051 | -7.6287 |
| V006-3291 | 0.9992 | 8.7025 | -9.4725 |
| M460-2244 | 0.9991 | 8.9798 | -7.8858 |
| 3209-0884 | 0.9990 | 8.6122 | None    |
| L855-0058 | 0.9989 | 8.6996 | -4.5421 |
| M769-1425 | 0.9989 | 8.7582 | -7.3411 |
| C200-0812 | 0.9987 | 8.9092 | -6.5423 |
| G281-2304 | 0.9986 | 8.6122 | -1.3766 |
| 8010-2605 | 0.9985 | 8.6211 | None    |
| G856-8325 | 0.9984 | 8.7683 | -9.6361 |
| C163-0025 | 0.9981 | 8.8068 | -8.0547 |
| V030-9758 | 0.9981 | 8.9498 | -8.9287 |
| V006-3679 | 0.9979 | 8.7418 | -9.2080 |
| M460-2265 | 0.9978 | 8.6296 | -8.4071 |
| G856-8308 | 0.9977 | 8.6416 | -9.0176 |
| L880-0285 | 0.9976 | 8.7407 | -5.1432 |
| P704-0166 | 0.9974 | 8.6151 | -7.4346 |
| L539-0325 | 0.9973 | 8.6117 | -7.8659 |
| L977-1354 | 0.9973 | 8.6063 | -2.7656 |
| 8007-8597 | 0.9972 | 8.6505 | -7.5859 |

|           |        |        |         |
|-----------|--------|--------|---------|
| 2265-3136 | 0.9972 | 8.6034 | None    |
| M520-0742 | 0.9970 | 8.6904 | -8.8531 |
| V008-6168 | 0.9968 | 8.8348 | -8.5468 |
| M520-0662 | 0.9967 | 8.6738 | -8.7562 |
| 8015-4975 | 0.9964 | 8.7747 | -5.5618 |
| C226-4308 | 0.9960 | 8.8256 | -7.5766 |
| E955-0805 | 0.9949 | 8.6627 | None    |
| L880-0286 | 0.9948 | 8.6384 | -5.7523 |
| F431-0440 | 0.9943 | 8.6648 | -7.3802 |
| Y020-7930 | 0.9941 | 8.6259 | -5.6173 |
| M460-3727 | 0.9939 | 8.6979 | -8.5876 |
| P392-2143 | 0.9933 | 8.7914 | -9.0883 |
| L858-0205 | 0.9932 | 8.6213 | -3.2103 |
| M460-2223 | 0.9926 | 8.6092 | -6.9175 |
| M460-2191 | 0.9923 | 8.6177 | -6.6068 |
| J093-0740 | 0.9922 | 8.6521 | -8.4309 |
| M769-1402 | 0.9922 | 8.6924 | -6.9686 |
| SB33-0022 | 0.9917 | 8.6459 | -6.0260 |
| S556-0709 | 0.9917 | 8.7039 | -7.0693 |
| M520-0729 | 0.9914 | 8.8291 | -9.1131 |
| C163-0043 | 0.9909 | 8.6221 | -8.2081 |
| K305-0042 | 0.9908 | 8.8660 | -6.9674 |
| V008-7569 | 0.9902 | 8.7126 | -5.2661 |
| E955-1055 | 0.9901 | 8.6774 | None    |
| D725-0060 | 0.9900 | 8.6192 | -6.8281 |

**Table S6.** The performance of DeepBindGCN\_RG\_x with different training epoch on the PDBbind v.2016 core set (CASF-2016).

| Epoch | Rmse   | Mse    | Pearson | Spearman | CI     |
|-------|--------|--------|---------|----------|--------|
| 100   | 1.4491 | 2.0998 | 0.7593  | 0.7574   | 0.7826 |
| 200   | 1.4500 | 2.1024 | 0.7508  | 0.7577   | 0.7857 |
| 300   | 1.4268 | 2.0357 | 0.7605  | 0.7615   | 0.7866 |
| 400   | 1.3874 | 1.9250 | 0.7699  | 0.7692   | 0.7902 |
| 500   | 1.4299 | 2.0447 | 0.7534  | 0.7542   | 0.7815 |
| 600   | 1.4279 | 2.0390 | 0.7539  | 0.7525   | 0.7807 |
| 700   | 1.4240 | 2.0279 | 0.7588  | 0.7570   | 0.7848 |
| 800   | 1.3969 | 1.9514 | 0.7696  | 0.7593   | 0.7859 |
| 900   | 1.4007 | 1.9620 | 0.7655  | 0.7618   | 0.7849 |
| 1000  | 1.3973 | 1.9524 | 0.7659  | 0.7530   | 0.7810 |
| 1100  | 1.3867 | 1.9230 | 0.7703  | 0.7642   | 0.7855 |
| 1200  | 1.3843 | 1.9162 | 0.7719  | 0.7672   | 0.7891 |
| 1300  | 1.3882 | 1.9270 | 0.7696  | 0.7573   | 0.7847 |
| 1400  | 1.3981 | 1.9547 | 0.7656  | 0.7533   | 0.7833 |
| 1500  | 1.4094 | 1.9864 | 0.7610  | 0.7440   | 0.7768 |
| 1600  | 1.4304 | 2.0461 | 0.7533  | 0.7405   | 0.7757 |
| 1700  | 1.4292 | 2.0426 | 0.7538  | 0.7407   | 0.7772 |
| 1800  | 1.4322 | 2.0511 | 0.7520  | 0.7369   | 0.7750 |
| 1900  | 1.3985 | 1.9558 | 0.7694  | 0.7538   | 0.7814 |
| 2000  | 1.4190 | 2.0136 | 0.7584  | 0.7431   | 0.7773 |

**Table S7.** The performance of DeepBindGCN\_RG\_x with different training epoch on the PDBbind v.2013 core set.

| Epoch | Rmse   | Mse    | Pearson | Spearman | CI     |
|-------|--------|--------|---------|----------|--------|
| 100   | 1.6113 | 2.5963 | 0.7078  | 0.7019   | 0.7563 |
| 200   | 1.5519 | 2.4083 | 0.7340  | 0.7259   | 0.7677 |
| 300   | 1.5121 | 2.2864 | 0.7415  | 0.7216   | 0.7686 |
| 400   | 1.4921 | 2.2263 | 0.7493  | 0.7372   | 0.7722 |
| 500   | 1.5385 | 2.3668 | 0.7295  | 0.7166   | 0.7640 |
| 600   | 1.5103 | 2.2811 | 0.7413  | 0.7306   | 0.7730 |
| 700   | 1.5064 | 2.2693 | 0.7460  | 0.7366   | 0.7756 |
| 800   | 1.4931 | 2.2294 | 0.7506  | 0.7289   | 0.7726 |
| 900   | 1.4828 | 2.1986 | 0.7514  | 0.7321   | 0.7741 |
| 1000  | 1.4823 | 2.1971 | 0.7524  | 0.7339   | 0.7734 |
| 1100  | 1.4750 | 2.1756 | 0.7548  | 0.7417   | 0.7758 |
| 1200  | 1.4864 | 2.2094 | 0.7503  | 0.7358   | 0.7740 |
| 1300  | 1.5318 | 2.3463 | 0.7314  | 0.7153   | 0.7667 |
| 1400  | 1.4775 | 2.1830 | 0.7539  | 0.7390   | 0.7779 |
| 1500  | 1.5091 | 2.2775 | 0.7414  | 0.7222   | 0.7669 |
| 1600  | 1.5226 | 2.3183 | 0.7367  | 0.7219   | 0.7665 |
| 1700  | 1.5351 | 2.3564 | 0.7307  | 0.7170   | 0.7659 |
| 1800  | 1.5011 | 2.2534 | 0.7450  | 0.7224   | 0.7687 |
| 1900  | 1.4844 | 2.2035 | 0.7540  | 0.7375   | 0.7743 |
| 2000  | 1.4986 | 2.2458 | 0.7467  | 0.7272   | 0.7725 |

**Table S8.** Performance of DeepBindGCN\_BC\_onehot representation on test set during the training with epoch interval 100.

| Epoch | AUC    | TPR    | Precision | Accuracy |
|-------|--------|--------|-----------|----------|
| 100   | 0.8420 | 0.6208 | 0.5950    | 0.7996   |
| 200   | 0.8509 | 0.6088 | 0.6185    | 0.8083   |
| 300   | 0.8586 | 0.6238 | 0.6204    | 0.8105   |
| 400   | 0.8615 | 0.6017 | 0.6452    | 0.8177   |
| 500   | 0.8607 | 0.6075 | 0.6353    | 0.8147   |
| 600   | 0.8662 | 0.6383 | 0.6289    | 0.8154   |
| 700   | 0.8684 | 0.6021 | 0.6653    | 0.8248   |
| 800   | 0.8663 | 0.6263 | 0.6555    | 0.8243   |
| 900   | 0.8672 | 0.6575 | 0.6345    | 0.8197   |
| 1000  | 0.8722 | 0.6208 | 0.6709    | 0.8291   |
| 1100  | 0.8722 | 0.6363 | 0.6628    | 0.8281   |
| 1200  | 0.8740 | 0.6342 | 0.6708    | 0.8307   |
| 1300  | 0.8748 | 0.6254 | 0.6692    | 0.8291   |
| 1400  | 0.8758 | 0.6388 | 0.6721    | 0.8318   |
| 1500  | 0.8704 | 0.6038 | 0.6806    | 0.8301   |
| 1600  | 0.8697 | 0.6442 | 0.6526    | 0.8253   |
| 1700  | 0.8719 | 0.6400 | 0.6615    | 0.8281   |
| 1800  | 0.8744 | 0.6421 | 0.6668    | 0.8303   |
| 1900  | 0.8762 | 0.6746 | 0.6489    | 0.8274   |
| 2000  | 0.8667 | 0.6471 | 0.6642    | 0.8300   |

**Table S9.** Performance of DeepBindGCN\_RG\_onehot on test set during the training with epoch interval 100.

| Epoch | Rmse   | Mse    | Pearson | Spearman | CI     |
|-------|--------|--------|---------|----------|--------|
| 100   | 1.4180 | 2.0108 | 0.6785  | 0.6717   | 0.7438 |
| 200   | 1.5076 | 2.2728 | 0.6620  | 0.6531   | 0.7365 |
| 300   | 1.4459 | 2.0907 | 0.6772  | 0.6663   | 0.7416 |
| 400   | 1.4240 | 2.0278 | 0.6813  | 0.6703   | 0.7433 |
| 500   | 1.3913 | 1.9357 | 0.6904  | 0.6798   | 0.7475 |
| 600   | 1.3880 | 1.9266 | 0.6920  | 0.6789   | 0.7474 |
| 700   | 1.3441 | 1.8067 | 0.7066  | 0.6954   | 0.7548 |
| 800   | 1.3422 | 1.8015 | 0.7072  | 0.6941   | 0.7541 |
| 900   | 1.3364 | 1.7860 | 0.7147  | 0.7052   | 0.7591 |
| 1000  | 1.3249 | 1.7553 | 0.7146  | 0.7025   | 0.7584 |
| 1100  | 1.3130 | 1.7241 | 0.7238  | 0.7123   | 0.7625 |
| 1200  | 1.3006 | 1.6915 | 0.7249  | 0.7125   | 0.7635 |
| 1300  | 1.3008 | 1.6920 | 0.7246  | 0.7129   | 0.7634 |
| 1400  | 1.3153 | 1.7299 | 0.7179  | 0.7031   | 0.7589 |
| 1500  | 1.3075 | 1.7095 | 0.7226  | 0.7072   | 0.7613 |
| 1600  | 1.3154 | 1.7303 | 0.7155  | 0.6988   | 0.7574 |
| 1700  | 1.3076 | 1.7099 | 0.7196  | 0.7024   | 0.7589 |
| 1800  | 1.3051 | 1.7034 | 0.7223  | 0.7070   | 0.7610 |
| 1900  | 1.2987 | 1.6865 | 0.7247  | 0.7088   | 0.7613 |
| 2000  | 1.3060 | 1.7058 | 0.7231  | 0.7062   | 0.7607 |

## References

1. DeLano, W.L. Pymol: An open-source molecular graphics tool. *CCP4 Newsl. Protein Crystallogr.* **2002**.
2. Laio, A.; Gervasio, F.L. Metadynamics: A method to simulate rare events and reconstruct the free energy in biophysics, chemistry and material science. *Reports Prog. Phys.* **2008**, doi:10.1088/0034-4885/71/12/126601.
3. Saleh, N.; Ibrahim, P.; Saladino, G.; Gervasio, F.L.; Clark, T. An Efficient Metadynamics-Based Protocol to Model the Binding Affinity and the Transition State Ensemble of G-Protein-Coupled Receptor Ligands. *J. Chem. Inf. Model.* **2017**, *57*, 1210–1217, doi:10.1021/acs.jcim.6b00772.
4. Zhang, H.; Yang, Y.; Li, J.; Wang, M.; Saravanan, K.M.; Wei, J.; Tze-Yang Ng, J.; Tofazzal Hossain, M.; Liu, M.; Zhang, H.; et al. A novel virtual screening procedure identifies Pralatrexate as inhibitor of SARS-CoV-2 RdRp and it reduces viral replication in vitro. *PLoS Comput. Biol.* **2020**, *16*, e1008489, doi:10.1371/journal.pcbi.1008489.
5. Ruiz-Carmona, S.; Schmidtke, P.; Luque, F.J.; Baker, L.; Matassova, N.; Davis, B.; Roughley, S.; Murray, J.; Hubbard, R.; Barril, X. Dynamic undocking and the quasi-bound state as tools for drug discovery. *Nat. Chem.* **2017**, *9*, 201–206, doi:10.1038/nchem.2660.
6. Hess, B.; Kutzner, C.; Van Der Spoel, D.; Lindahl, E. GRGMACS 4: Algorithms for highly efficient, load-balanced, and scalable molecular simulation. *J. Chem. Theory Comput.* **2008**, *4*, 435–447, doi:10.1021/ct700301q.
7. Hornak, V.; Simmerling, C. Generation of accurate protein loop conformations through low-barrier molecular dynamics. *Proteins Struct. Funct. Genet.* **2003**, *51*, 577–590, doi:10.1002/prot.10363.
8. Sousa da Silva, A.W.; Vranken, W.F. ACPYPE - AnteChamber PYthon Parser interface. *BMC Res. Notes* **2012**, *5*, 367, doi:10.1186/1756-0500-5-367.
9. Wang, J.; Wang, W.; Kollman, P.A.; Case, D.A. Automatic atom type and bond type perception in molecular mechanical calculations. *J. Mol. Graph. Model.* **2006**, *25*, 247–260, doi:10.1016/j.jmgm.2005.12.005.
10. Jorgensen, W.L.; Chandrasekhar, J.; Madura, J.D.; Impey, R.W.; Klein, M.L. Comparison of simple potential functions for simulating liquid water. *J. Chem. Phys.* **1983**, *79*, 926–935, doi:10.1063/1.445869.
11. Van Der Spoel, D.; Lindahl, E.; Hess, B.; Groenhof, G.; Mark, A.E.; Berendsen, H.J.C. GROMACS: Fast, flexible, and free. *J. Comput. Chem.* **2005**, *26*, 1701–1718.
12. Darden, T.; York, D.; Pedersen, L. Particle mesh Ewald: An N·log(N) method for Ewald sums in large systems. *J. Chem. Phys.* **1993**, *98*, 10089–10092, doi:10.1063/1.464397.
13. Hess, B.; Bekker, H.; Berendsen, H.J.C.; Fraaije, J.G.E.M. LINCS: A Linear Constraint Solver for molecular simulations. *J. Comput. Chem.* **1997**, *18*, 1463–1472, doi:10.1002/(SICI)1096-987X(199709)18:12<1463::AID-JCC4>3.0.CO;2-H.
14. Tribello, G.A.; Bonomi, M.; Branduardi, D.; Camilloni, C.; Bussi, G. PLUMED 2: New feathers for an old bird. *Comput. Phys. Commun.* **2014**, *185*, 604–613, doi:10.1016/j.cpc.2013.09.018.
15. Williams, T.; Kelley, C.; Campbell, J.; Cunningham, R.; Denholm, D.; Elber, G.; Fearick, R.; Grammes, C.; Hart, L.; Hecking, L.; et al. Gnuplot 4.6. *Softw. Man.* **2012**.
